# Supplementary material for: Systemic silencing of an endogenous plant gene by two classes of mobile 21‐nucleotide artificial small RNAs
Source: PubMed Central journal article supplement (PMC9310713; doi:10.1111/tpj.15730), 2022-03-27
Supplement: TPJ-110-1166-s003.pdf [file TPJ-110-1166-s003.pdf]

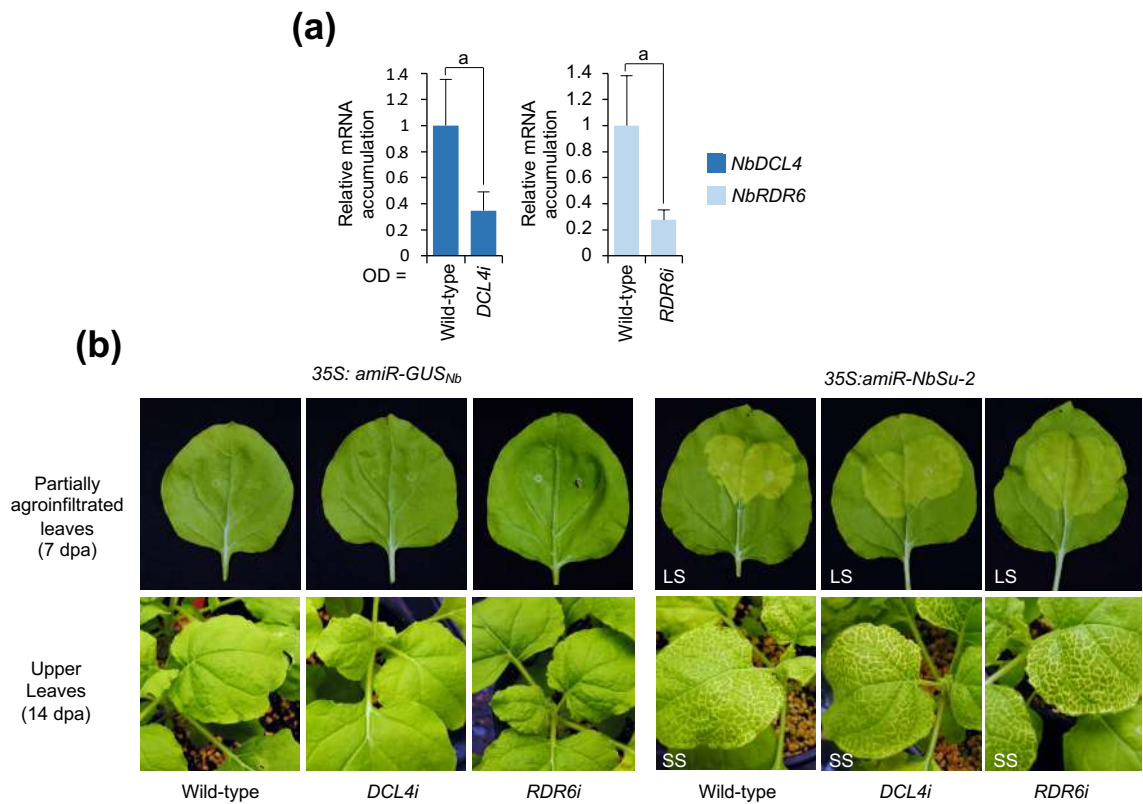

**Fig. S1.** Genetic analysis of local and systemic silencing triggered by *amiR-NbSu-2* in wild-type and in *DCL4* (*DCL4i*) or *RDR6* (*RDR6i*) knockdown plants. (a) Accumulation of *NbDCL4* and *NbRDR6* mRNAs in leaves of wild-type, *DCL4i* and *RDR6i* *N. benthamiana* plants. Mean relative level (n=3) + standard error of mRNAs after normalization to *PROTEIN PHOSPHATASE 2A* (*PP2A*), as determined by quantitative RT-PCR (qPCR) (Wild-type = 1.0 in all comparisons). Other details are as in Fig 1b. (b) Photos of partially agroinfiltrated leaves at 7 days-post agroinfiltration (dpa) (top), and of upper non-agroinfiltrated leaves at 14 dpa (bottom). Other details are as in Fig. 2a.

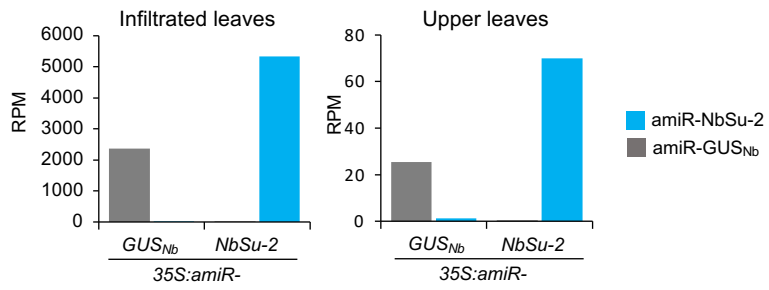

**Fig. S2.** Bar graphs showing the number of amiR-GUS<sub>Nb</sub> and amiR-NbSu-2 reads in 35S:amiR-GUS<sub>Nb</sub> and 35S:amiR-NbSu-2 expressing tissues and in upper leaves.

(a)

35S:syn-tasiR-NbSu-2

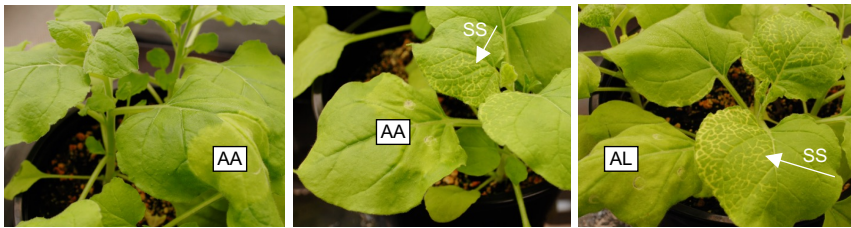

Agroinfiltration of the distal region of the leaf

Agroinfiltration of the basal region of the leaf

Agroinfiltration of the whole leaf surface

(b)

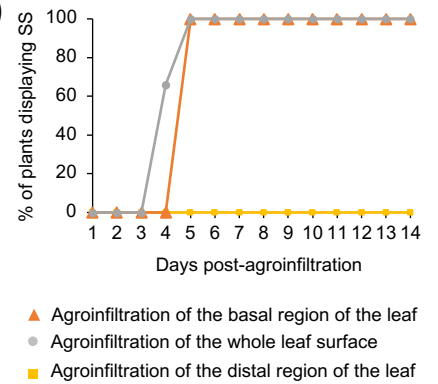

**Fig. S3.** Effects on systemic silencing of the place of expression of syn-tasiR-NbSu-2 in *N. benthamiana* leaves. (a) Photos of plants at 7 days post-agroinfiltration (dpa). AA and AL refer to agroinfiltrated area and agroinfiltrated leaf, respectively. Near-vein chlorotic areas result of systemic silencing (SS) are pointed with a white arrow. (b) Two-dimensional line graph showing, for each of the three-plant sets listed in the box, the percentage of plants displaying systemic silencing per day during 14 dpa.

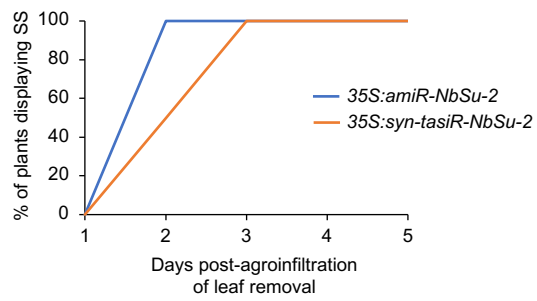

**Fig. S4.** Speed of translocation of the systemic silencing (SS) signal. Bar graph shows the percentage of plants displaying SS after removal of the agroinfiltrated leaves at 1, 2, 3, 4 or 5 days post-agroinfiltration (dpa).

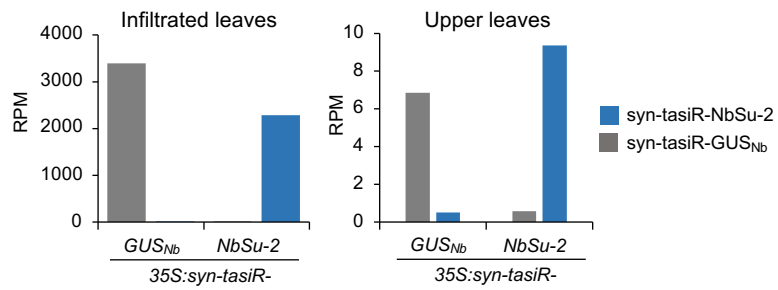

**Fig. S5.** Bar graphs showing the number of syn-tasiR-GUS<sub>Nb</sub> and syn-tasiR-NbSu-2 reads in 35S:syn-tasiR-GUS<sub>Nb</sub> and 35S:syn-tasiR-NbSu-2 expressing tissues and in upper leaves.
