# Supplementary material for: Systemic silencing of an endogenous plant gene by two classes of mobile 21‐nucleotide artificial small RNAs
Source: PubMed Central journal article supplement (PMC9310713; doi:10.1111/tpj.15730), 2022-03-27
Supplement: TPJ-110-1166-s004.pdf [file TPJ-110-1166-s004.pdf]

**Table S1.** Artificial small RNA-induced systemic silencing (SS) appearance as leaf near-vein chlorosis in upper or lower non-agroinfiltrated leaves during 14 days post-agroinfiltration.

| <b>Art-sRNA construct</b>   | <b>Agroinfiltrated leaves*</b> | <b>SS in lower leaves</b> | <b>SS in upper leaves</b> |
|-----------------------------|--------------------------------|---------------------------|---------------------------|
| <i>35S:amiR-NbSu-2</i>      | 3-4                            | 0/3                       | 3/3                       |
|                             | 5-6                            | 0/3                       | 3/3                       |
|                             | 7-8                            | 0/3                       | 3/3                       |
| <i>35S:syn-tasiR-NbSu-2</i> | 3-4                            | 0/3                       | 3/3                       |
|                             | 5-6                            | 0/3                       | 3/3                       |
|                             | 7-8                            | 0/3                       | 3/3                       |

\*leaf numbers refer to the age of the leaf, with leaf number 1 being the oldest leaf

**Table S2.** Name, sequence and use of DNA oligonucleotides used in this study.

| Oligonucleotide                | Sequence                                                                         | Construct/Aim                                                       |
|--------------------------------|----------------------------------------------------------------------------------|---------------------------------------------------------------------|
| AC-55                          | AGGGGCCATGCTAATCTTCTC                                                            | DNA probe for U6 detection                                          |
| AC-257                         | TTTATGTATGACTCCCGGAATTCCA                                                        | 35S: <i>syn-tasiR-NbSu-2</i>                                        |
| AC-258                         | CCGATGGAATTCGGGAGTCATACA                                                         |                                                                     |
| AC-310                         | TGTATGTATGACTCCCGGAATTCCTTATGATGATCACA<br>TTCGTTATCTATTTTTTAAGGATTCGGTGAGTCATACA | 35S: <i>amiR-NbSu-2-22</i>                                          |
| AC-311                         | AATGTGTATGACTCACGGAATCCTTAAAAAATAGATAA<br>CGAATGTGATCATCATAAGGAATTCGGGAGTCATACA  |                                                                     |
| AC-337                         | TATAGGGGGGAAAAAAGGTAG                                                            | PCR <i>AtMIR390a</i> -based<br>amiRNA precursors                    |
| AC-338                         | GAGACTAAAGATGAGATCTAAT                                                           |                                                                     |
| AC-346                         | T+GGA+ATT+CCG+GGA+GTC+ATA+CA                                                     | LNA probe for amiR-<br>NbSu-2/ <i>syn-tasiR-NbSu-2</i><br>detection |
| AC-355                         | TCACACCCTGCCCGATTTAT                                                             | <i>NbSu</i> qPCR                                                    |
| AC-356                         | GCAGAAAGAGCGTTCCCTAGC                                                            |                                                                     |
| AC-365                         | GACCCTGATGTTGATGTTTCGCT                                                          | <i>NbPP2A</i> PCR/qPCR                                              |
| AC-366                         | GAGGGATTTGAAGAGAGATTTTC                                                          |                                                                     |
| AC-417                         | G+CGG+GAA+GTC+CAC+CAC+GGT+TA                                                     | LNA probe for amiR-<br>NbSu-1 detection                             |
| AC-419                         | T+AGA+TGG+TTG+ATT+TAC+CGC+TA                                                     | LNA probe for amiR-<br>NbSu-3 detection                             |
| AC-532                         | CTCGTGCTGCCCTGTTAGTACTATA                                                        | <i>NbSu</i> PCR (5'RLM-<br>RACE)                                    |
| D2057                          | TGTATCTTGTAAACGCGCTTTCCAGATGATGATCACAT<br>TCGTTATCTATTTTTTCTGGGAAAGCTCGTTACAAGA  | 35S: <i>amiR-GUS<sub>Nb</sub></i>                                   |
| D2058                          | AATGTCTTGTAAACGAGCTTTCCAGAAAAAATAGATAA<br>CGAATGTGATCATCATCTGGGAAAGCGCTTACAAGA   |                                                                     |
| D2065                          | TGTATAACCGTGGTGGACTTCCCGCATGATGATCACAT<br>TCGTTATCTATTTTTTGGCGGAAGTCAACCACGGTTA  | 35S: <i>amiR-NbSu-1</i>                                             |
| D2066                          | AATGTAACCGTGGTTGACTTCCCGCAAAAAAATAGATAA<br>CGAATGTGATCATCATGCGGGAAGTCCACCACGGTTA |                                                                     |
| D2067                          | TGTATGTATGACTCCCGGAATTCGAATGATGATCACAT<br>TCGTTATCTATTTTTTGGAAATTCGGTGAGTCATACA  | 35S: <i>amiR-NbSu-2</i>                                             |
| D2068                          | AATGTGTATGACTCACGGAATTCAAAAAATAGATAA<br>CGAATGTGATCATCATGGAATTCGGGAGTCATACA      |                                                                     |
| D2224                          | AAACCTAAACCTAAACGGCTAAGC                                                         | PCR <i>AtTAS1c</i> -based <i>syn-</i><br><i>tasiRNA</i> precursors  |
| D2225                          | ATTTCACTTTACGATGTGGTG                                                            |                                                                     |
| GeneRacer 5'<br>Oligo          | CGACTGGAGCACGAGGACACTGA                                                          | <i>NbSu</i> PCR (5'RLM-<br>RACE)                                    |
| GeneRacer Oligo<br>dT          | GCTGTCAACGATACGCTACGTAACGGCATGACAGTGTT<br>TTTTTTTTTTTTTTTTTTTTTTTTTTTTTTTT       | cDNA synthesis (5'RLM-<br>RACE)                                     |
| GeneRacer RNA<br>Oligo Adapter | CGACUGGAGCACGAGGACACUGACAUGGACUGAAGGAG<br>UAGAAA                                 | RNA ligation (5'RLM-<br>RACE)                                       |
